# Supplementary material
Source: PubMed Central journal article supplement (PMC7552889)

## Supplementary Figure 2

Kaplan-Meier curves of recurrence-free survival for patients who achieved pathologic downstaging to non-muscle invasive residual tumor after either neoadjuvant chemotherapy or TURB alone.

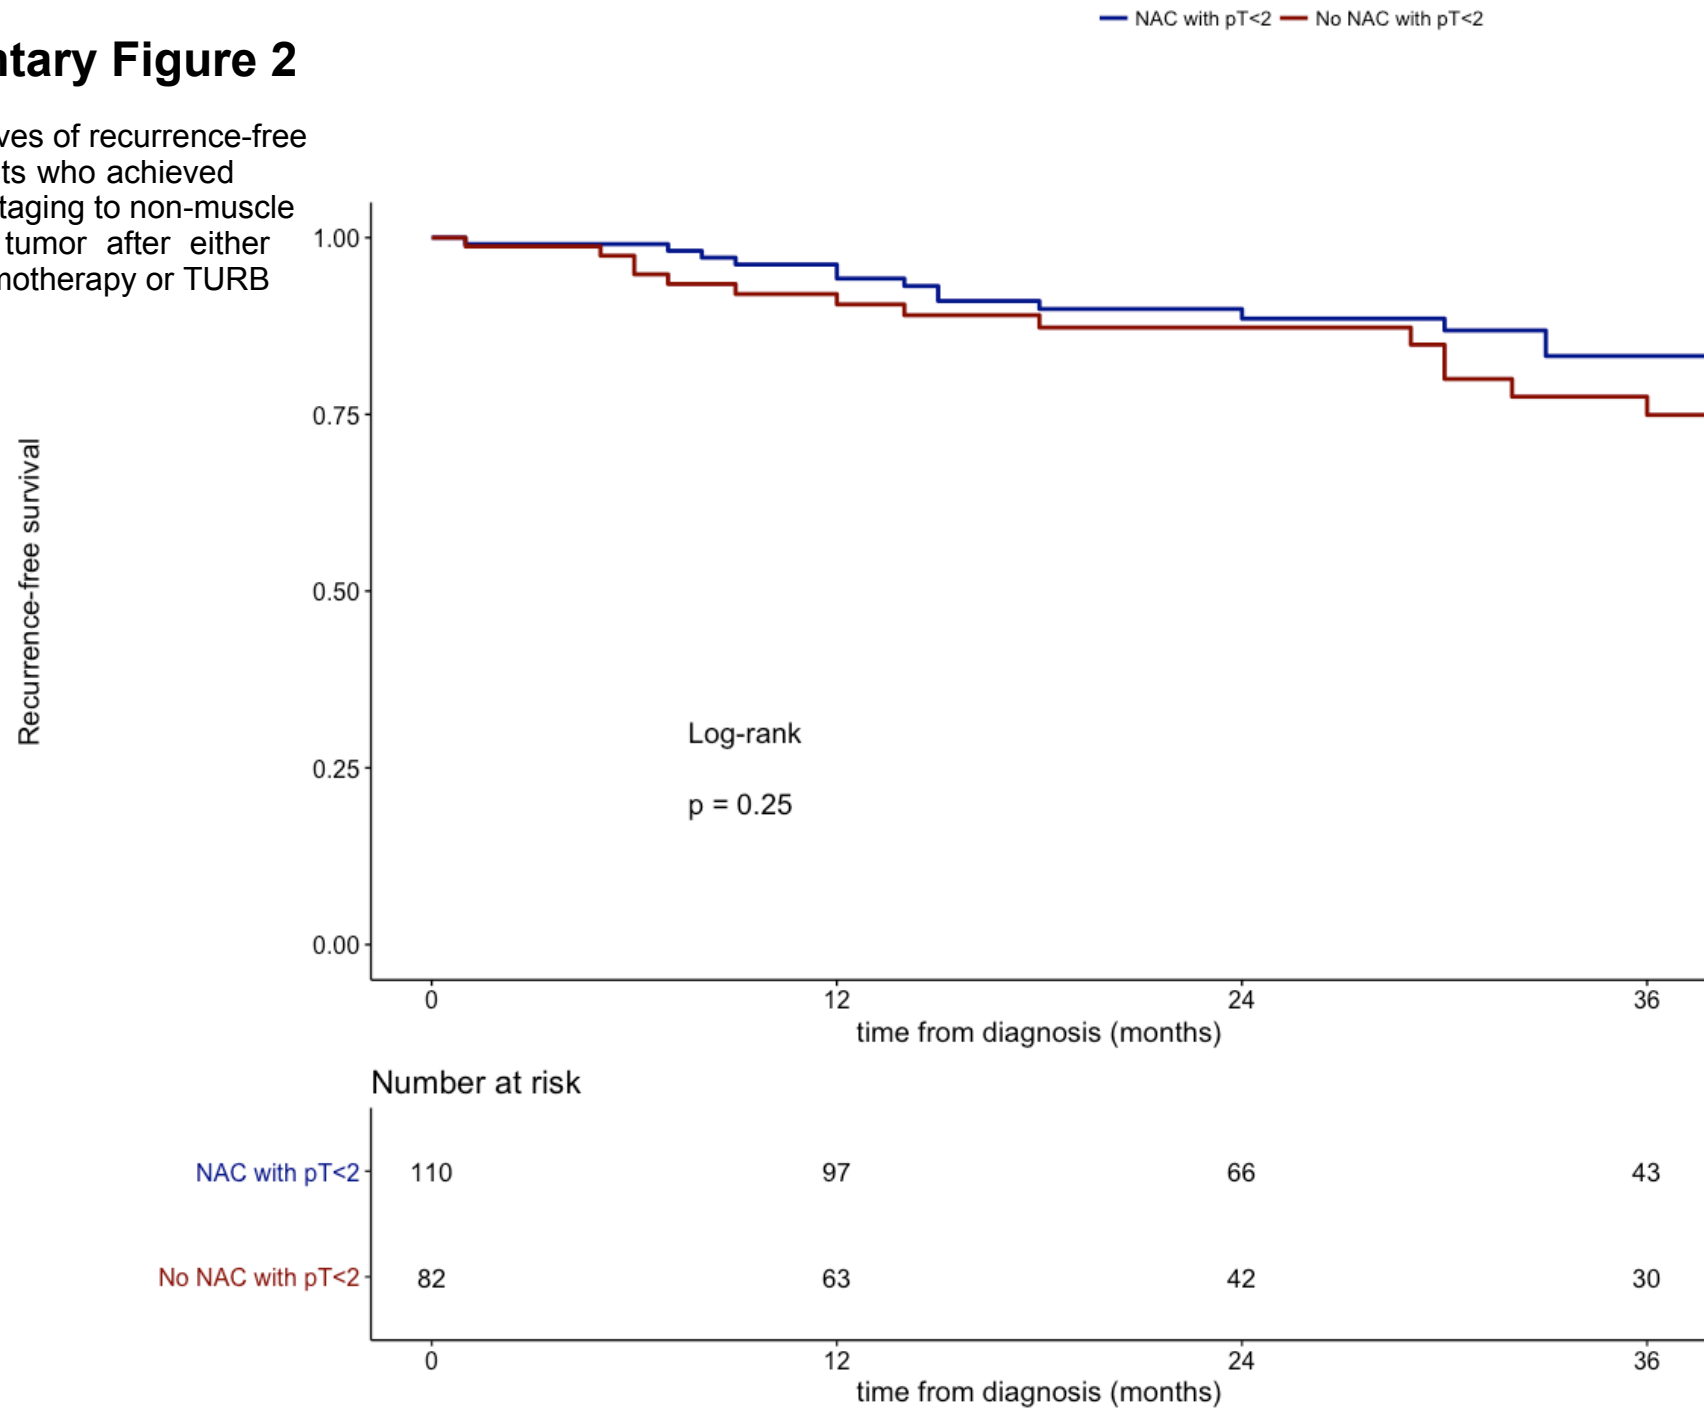

Supplement: NIHMS1627424-supplement-2.pdf [file NIHMS1627424-supplement-2.pdf]
